# Supplementary material
Source: MDPI journal article supplement (https://www.mdpi.com/2673-8112/2/1/2)
Supplement: s1 [file s1]

# Supplementary Material

**Supplementary Table S1.** Strain number of the selected human coronaviruses (HCoVs).

| Virus Species | No. GenBank                                                                                                  |
|---------------|--------------------------------------------------------------------------------------------------------------|
| HCoV-229E     | NC_002645 / KF514432 / KF514430 / KF514433 / JX503061 / JX503060                                             |
| HCoV-OC43     | NC_003045 / AY585229 / AY903459 / JN129834 / KP198610 / KP198611 / KJ958218 / KF530060 / KF530099 / KF530096 |
| HCoV-NL63     | NC_005831 / JX524171 / JQ765563 / JQ765569 / JQ765566 / DQ445911 / JX504050 / KF530104 / KF530110            |
| HCoV-HKU1     | NC_006577 / AY884001 / DQ415896 / DQ415897 / DQ415902 / HM034837 / KF686340 / KF430201                       |
| SARS-CoV      | AY278489 / AY772062 / DQ182595 / AY278741 / AY304486 / AY304488 / AY278488                                   |
| MERS-CoV      | JX869059 / KC667074 / KC164505 / KF192507 / KF186567 / KC776174                                              |
| SARS-CoV-2    | MW134174 / MW134155 / MW130867 / LC581375 / LC581368 / LC581364 / MW086898 / MW065480 / MW064953 / MW064875  |

**Supplementary Table S2.** Related values of mass probe extension (MPE) amplification.

| Target Gene     | MPE Sequence                   | Direction      | MPE Mass (Da) | Extension base | Product Sequence                | Product Mass (Da) |
|-----------------|--------------------------------|----------------|---------------|----------------|---------------------------------|-------------------|
| HCoV-229E-N     | CCAACCAGAGATACCACAC-TTCAA      | F <sup>1</sup> | 7243.8        | T              | CCAACCAGAGATACCACAC-TTCAAT      | 7585.8            |
| HCoV-229E-RdRp  | CCCCATGTATAACTTACTTA AAGG      | F              | 7295.8        | C              | CCCCATGTATAACTTACTTAA AGGC      | 7568.8            |
| HCoV-NL63-N     | TACCAGTCGAAGTCACCT             | F              | 5443.6        | A              | TACCAGTCGAAGTCACCTA             | 5740.6            |
| HCoV-NL63-RdRp  | GAAAGCAATTAGGTTTGGT            | F              | 5906.8        | T              | GAAAGCAATTAGGTTTGGTT            | 6248.8            |
| HCoV-OC43-N     | ATTCGCTACTT-GGGTCCCGAT         | R <sup>2</sup> | 6388.2        | G              | ATTCGCTACTT-GGGTCCCGATC         | 6661.2            |
| HCoV-OC43-RdRp  | CGCATGACACATGGTCAG             | R              | 5508.6        | G              | CGCATGACACATGGTCAGC             | 5781.6            |
| HCoV-HKU1-N     | GGAGAAGTTTTCTTGAG-GATT         | R              | 6531.2        | G              | GGAGAAGTTTTCTTGAG-GATTTC        | 6804.2            |
| HCoV-HKU1-RdRp  | GGGTGCATAGCAG-GATCTGCTGCATA    | R              | 8051.2        | T              | GGGTGCATAGCAG-GATCTGCTGCATAA    | 8348.2            |
| MERS-CoV-N      | CCAAAATTAATACCGG-GAATGGA       | F              | 7089.6        | A              | CCAAAATTAATACCGG-GAATGGAA       | 7386.6            |
| MERS-CoV-E      | CCGGCTACTAGAT-TATGTGTGCAAT     | F              | 7672.0        | G              | CCGGCTACTAGAT-TATGTGTGCAATG     | 7985.0            |
| MERS-CoV-RdRp   | AGCCAAGCTATCTTAAACA            | F              | 5764.8        | C              | AGCCAAGCTATCTTAAACAC            | 6037.8            |
| MERS-CoV-ORF1b  | CCCCACAGGGTCATCAACA AT         | R              | 6344.2        | T              | CCCCACAGGGTCATCAACAA TA         | 6641.2            |
| SARS-CoV-N      | GGGCAGAGACAAAAGAA-GCAGCCC      | F              | 7438.8        | A              | GGGCAGAGACAAAAGAA-GCAGCCCA      | 7735.8            |
| SARS-CoV-E      | TCTTGTTAACGTGAGTTTA GGGTTTTAA- | F              | 5823.8        | G              | TCTTGTTAACGTGAGTTTAG GGGTTTTAA- | 6136.8            |
| SARS-CoV-ORF1b  | TAACAGAAGGTTTCAGT              | F              | 7760.0        | C              | TAACAGAAGGTTTCAGTC              | 8033.0            |
| SARS-CoV2-ORF1b | CCCATCTTAACACAATTAG-TGATTGG    | R              | 7929.2        | A              | CCCATCTTAACACAATTAG-TGATTGGT    | 8271.2            |
| SARS-CoV2-N1    | CGACGTTGTTTTGATCG              | R              | 5207.4        | G              | CGACGTTGTTTTGATCGC              | 5480.4            |
| SARS-CoV2-N2    | TCTGGCTGG-CAATGGCGGTGAT        | F              | 6822.4        | G              | TCTGGCTGG-CAATGGCGGTGATG        | 7135.4            |
| SARS-CoV2-S     | CTCAATTTGGCAGAGACATT           | F              | 6116.0        | G              | CTCAATTTGGCAGAGACATTG           | 6429.0            |

|                        |                               |   |        |     |                                                                   |                   |
|------------------------|-------------------------------|---|--------|-----|-------------------------------------------------------------------|-------------------|
| SARS-CoV2-S<br>(D614G) | CCAGGGACTTCTGTGCAG-<br>TTAACA | R | 7352.8 | A/G | CCAGGGACTTCTGTGCAG-<br>TTAACAT/<br>CCAGGGACTTCTGTGCAG-<br>TTAACAC | 7694.8/<br>7625.8 |
|------------------------|-------------------------------|---|--------|-----|-------------------------------------------------------------------|-------------------|

<sup>1</sup>. F: Forward. <sup>2</sup>. R: Reverse.

**Supplementary Table S3.** Sample Information and Identification Results of United Nations Coronavirus (UN-CoV)-2020.

| Sample Set ID | Sample ID  | Sample Type              | Sample Description                                                | Result                     |
|---------------|------------|--------------------------|-------------------------------------------------------------------|----------------------------|
| A             | RKI-SW-1.1 | Human throat swab        | possibly contaminated (CoV pos <sup>1</sup> or neg <sup>2</sup> ) | CoV pos: <i>SARS-CoV-2</i> |
|               | RKI-SW-1.2 | Human throat swab        | possibly contaminated (CoV pos or neg)                            | CoV pos: <i>HCoV-NL63</i>  |
|               | RKI-SW-1.3 | Human throat swab        | Uncontaminated (neg control)                                      | CoV neg                    |
| B             | RKI-SW-2.1 | Human throat swab        | possibly contaminated (CoV pos or neg)                            | CoV pos: <i>SARS-CoV-2</i> |
|               | RKI-SW-2.2 | Human throat swab        | possibly contaminated (CoV pos or neg)                            | CoV neg                    |
|               | RKI-SW-2.2 | Human throat swab        | Uncontaminated (neg control)                                      | CoV neg                    |
| C             | RKI-SW-3.1 | Livestock throat swab    | possibly contaminated (CoV pos or neg)                            | CoV pos: <i>SARS-CoV-2</i> |
|               | RKI-SW-3.2 | Livestock throat swab    | possibly contaminated (CoV pos or neg)                            | CoV pos: <i>SARS-CoV</i>   |
|               | RKI-SW-3.3 | Livestock throat swab    | Uncontaminated (neg control)                                      | CoV neg                    |
| D             | RKI-SW-4.1 | Cell culture supernatant | possibly contaminated (CoV pos or neg)                            | CoV pos: <i>SARS-CoV-2</i> |
|               | RKI-SW-4.2 | Cell culture supernatant | possibly contaminated (CoV pos or neg)                            | CoV pos: <i>SARS-CoV</i>   |
|               | RKI-SW-4.3 | Cell culture supernatant | Uncontaminated (neg control)                                      | CoV neg                    |

<sup>1</sup>. pos: positive. <sup>2</sup>. neg: negative.

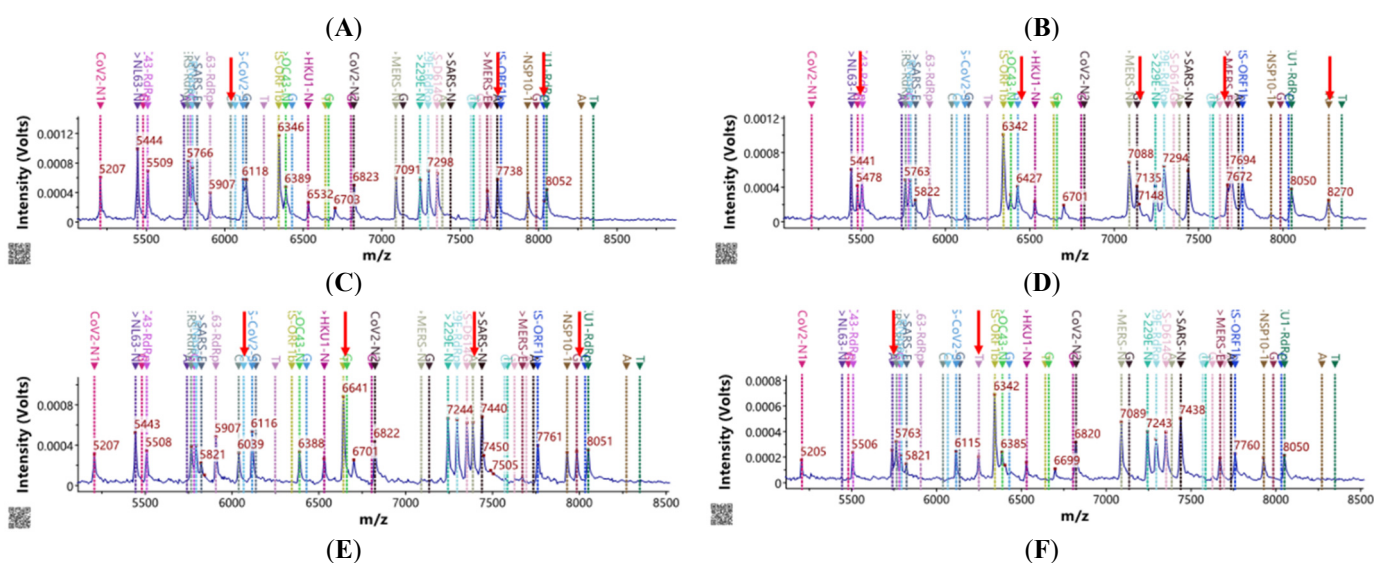

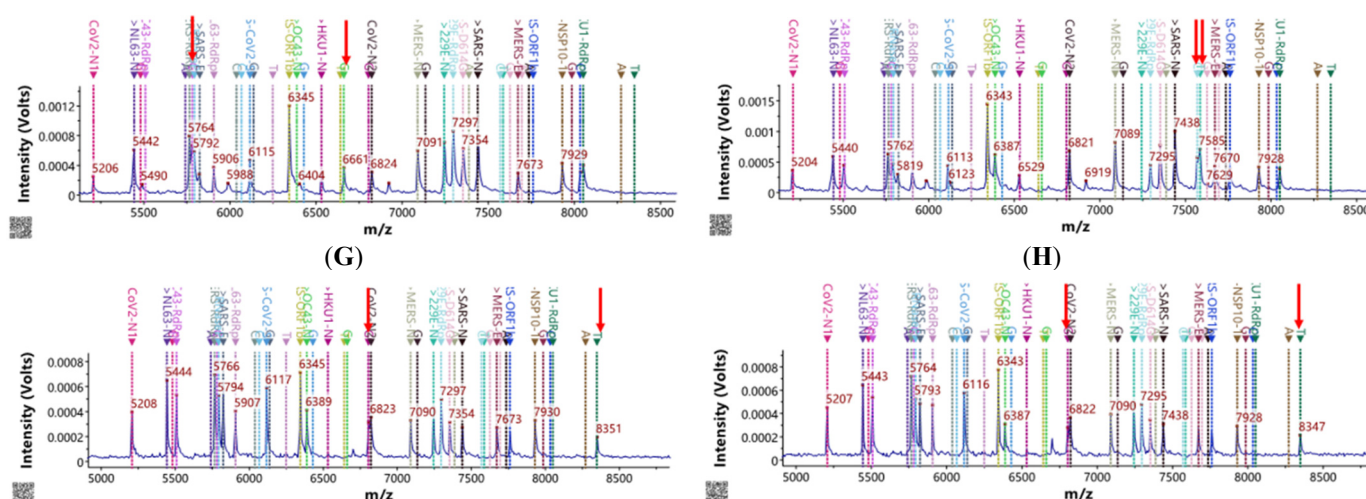

**Supplementary Figure S1. Amplification results of each plasmid target gene when 45 multiplex PCR (mPCR) cycles were used.** (A) The amplification results of each target gene of severe acute respiratory syndrome (SARS-CoV), the red arrows represent the *E*, *N*, and *ORF1ab* genes respectively. (B) The amplification results of each target gene of SARS-CoV-2, the red arrows represent the *N1*, *S*, *N2*, *S* (including the D614G mutation site), and *ORF1b* genes, respectively. (C) The amplification results of each target gene of Middle East respiratory syndrome-related coronavirus (MERS-CoV), the red arrows represent the *RdRp*, *ORF1b*, *N*, and *E* genes, respectively. (D) The amplification results of each target gene of human coronavirus (HCoV)-NL63, the red arrows represent the *N* and *RdRp* genes, respectively. (E) The amplification results of each target gene of HCoV-OC43, the red arrows represent the *RdRp* and *N* genes, respectively. (F) The amplification results of each target gene of HCoV-229E, the red arrows represent the *N* and *RdRp* genes, respectively. (G) The amplification results of each target gene of HCoV-HKU1-1, the red arrows represent the *N* and *RdRp* genes, respectively. (H) The amplification results of each target gene of HCoV-HKU1-2, the red arrows represent the *N* and *RdRp* genes, respectively.
